# Supplementary material for: Predicting the high heating value and nitrogen content of torrefied biomass using a support vector machine optimized by a sparrow search algorithm
Source: Royal Society of Chemistry journal article supplement (doi:10.1039/d2ra06869a), 2023-01-01
Supplement: d2ra06869a1.pdf [file d2ra06869a1.pdf]

## Supplementary Materials

### **Predicting the high heating value and nitrogen content of torrefied biomass using support vector machine hybrid with sparrow search algorithm**

Liu Xiaorui <sup>a</sup>, Yang Jiamin <sup>a</sup>, Yuan Longji <sup>b,\*</sup>

<sup>a</sup> *School of Mine, China University of Mining and Technology, 221116 Xuzhou, China; liuxiaorui214@cumt.edu.cn;*

<sup>b</sup> *School of Low-Carbon Energy and Power Engineering, China University of Mining and Technology, 221116 Xuzhou, China; yuanlongji@cumt.edu.cn.*

\* *Correspondence: yuanlongji@cumt.edu.cn;*

**Table.S1. Dataset.**

| Biomass                                         | Torrefaction condition                 | Ref. |
|-------------------------------------------------|----------------------------------------|------|
| olive residue, almond shell                     | N2, 275 °C, 60 min                     | 1    |
| olive tree                                      | He, 220~280 °C, 60~360 min             | 2    |
| rice husk                                       | Ar, 220~270 °C, 30~60 min              | 3    |
| coffee grounds                                  | N2, 200~300 °C, 30 min                 | 4    |
| banana leaf waste                               | N2, 220~280 °C, 1 min                  | 5    |
| rice straw, rice husk                           | N2, 200~300 °C, 30 min                 | 6    |
| pearl millet, walnut shell                      | N2, 230~300 °C, 30~90 min              | 7    |
| ash tree, hazelnut shell, refuse-derived fuel   | N2, 230~290 °C, 30 min                 | 8    |
| garden waste                                    | Ar, 200~300 °C, 30~60 min              | 9    |
| mixture of municipal organic wastes and biomass | N2, 200~275 °C, 30 min                 | 10   |
| empty fruit bunches                             | N2, 225~300 °C, 40 min                 | 11   |
| oil palm empty fruit bunch                      | N2, 250~300 °C, 30 min                 | 12   |
| caragana                                        | N2, 225~275 °C, 10~20 min              | 13   |
| pellet consists of 80% larch and 20% oak        | anoxic, 200~270 °C, 20~40 min          | 14   |
| rice straw, bamboo dust                         | N2, 250 °C, 15 min                     | 15   |
| pine sawdust                                    | N2, 260~300, 11 min                    | 16   |
| ananas comosus peel, annona squamosa peel       | N2, 210~300 °C, 30~60 min              | 17   |
| eucalyptus grandis                              | N2, 230~290 °C, 60 min                 | 18   |
| leucaena leucocephala                           | N2, 260~300 °C, 0~30 min               | 19   |
| moso bamboo                                     | N2, 200~300 °C, 60~120 min             | 20   |
| rice husk, rice straw                           | N2, 200~300 °C                         | 21   |
| pongamia seed pods                              | N2, 200~300 °C, 60 min                 | 22   |
| rubberwood                                      | N2, 200~300 °C, 20~60 min              | 23   |
| cellulose                                       | N2, 200~290 °C, 30 min                 | 24   |
| fruit waste                                     | N2, 210~300 °C, 30~60 min              | 25   |
| empty fruit bunches                             | N2, 225~300 °C, 20~60 min              | 26   |
| mustard crop residue                            | N2, 200~300 °C, 30~60 min              | 27   |
| pine, kenaf                                     | N2, 250 °C, 30 min                     | 28   |
| prosopis juliflora                              | N2, 230~270 °C, 30 min                 | 29   |
| sugarcane bagasse                               | N2, 230~280 °C, 30~45 min              | 30   |
| orange peel                                     | N2, 220~280 °C, 30 min                 | 31   |
| rice husk, rice straw                           | N2, 200~300 °C, 60 min                 | 32   |
| poplar wood                                     | N2, 200~300 °C, 60 min                 | 33   |
| olive kernel                                    | N2, 300 °C, 60 min                     | 34   |
| rice husk                                       | oxygen-deficient, 240~280 °C, 0~90 min | 35   |
| miscanthus, hops waste                          | oxygen-deficient, 250 °C, 60 min       | 36   |
| waste vine shoots                               | N2, 220~280 °C, 10~60 min              | 37   |
| almond shells, olive stones                     | N2, 250~300 °C, 45 min                 | 38   |
| sugarcane leaves                                | N2, 225~300 °C, 30 min                 | 39   |
| corncob                                         | N2, 210~300 °C, 30 min                 | 40   |
| bamboo forest residues                          | N2, 200~300 °C, 60 min                 | 41   |

| Biomass                                                         | Torrefaction condition                  | Ref. |
|-----------------------------------------------------------------|-----------------------------------------|------|
| leftover rice, leftover cabbage, leftover pork, watermelon peel | Ar, 200~300 °C, 30 min                  | 42   |
| wooden block                                                    | N <sub>2</sub> , 220~280 °C, 40 min     | 43   |
| sugarcane bagasse                                               | N <sub>2</sub> , 200~275 °C, 60 min     | 44   |
| sorghum straw                                                   | N <sub>2</sub> , 230~300 °C, 30~108 min | 45   |
| pigeon pea stalk, eucalyptus                                    | N <sub>2</sub> , 200~300 °C, 30 min     | 46   |
| sorghum straw                                                   | N <sub>2</sub> , 230~300 °C, 10 min     | 47   |
| rice straw                                                      | N <sub>2</sub> , 200~250 °C, 45 min     | 48   |
| pine wood, rice husk                                            | N <sub>2</sub> , 210~300 °C, 30 min     | 49   |
| rice husk                                                       | N <sub>2</sub> , 220~300 °C, 30 min     | 50   |
| mixture of waste wood, oak waste wood and sewage sludge         | oxygen-deficient, 220~300 °C, 120 min   | 51   |
| corn cob, rice husk                                             | N <sub>2</sub> , 200~300 °C, 30~60 min  | 52   |
| ponkan peel waste                                               | N <sub>2</sub> , 200~300 °C, 15~60 min  | 53   |
| black alder                                                     | N <sub>2</sub> , 250~300 °C, 30~60 min  | 54   |
| Norway spruce                                                   | N <sub>2</sub> , 225~275 °C, 30~60 min  | 55   |
| sugarcane bagasse                                               | N <sub>2</sub> , 200~300 °C, 15~60 min  | 56   |
| pigeon pea stalk                                                | N <sub>2</sub> , 225~275 °C, 15~45 min  | 57   |
| rice husk                                                       | N <sub>2</sub> , 210~300 °C, 30 min     | 58   |
| wood biomass                                                    | Ar, 230~290 °C, 60 min                  | 59   |
| pine wood                                                       | N <sub>2</sub> , 250~290 °C, 30~60 min  | 60   |
| vine pruning, olive tree pruning, corn stalk, poultry litters   | N <sub>2</sub> , 300 °C, 30 min         | 60   |
| rice straw, cotton stalk                                        | N <sub>2</sub> , 210~290 °C, 20~60 min  | 62   |
| cotton stalk, corn stalk                                        | N <sub>2</sub> , 200~290 °C, 30 min     | 63   |
| oil palm fiber, Eucalyptus                                      | N <sub>2</sub> , 250~300 °C, 60 min     | 64   |
| willow, reed canary grass, wheat straw                          | N <sub>2</sub> , 230~290 °C, 30 min     | 65   |
| rice straw                                                      | N <sub>2</sub> , 200~300 °C, 60 min     | 66   |

## References

- 1 K. Gürel, D. Magalhães and F. Kazanç, *Fuel*, 2022, **308**, 122054.
- 2 J. González-Arias, X. Gómez, M. González-Castaño, M.E. Sánchez, J.G. Rosas and J. Cara-Jiménez, *Energy*, 2022, **238**, 122022.
- 3 L. Zhang, Z. Wang, J. Ma, W. Kong, P. Yuan, R. Sun and B. Shen, *Fuel*, 2022, **310**, 122477.
- 4 J. Fu, J. Liu, W. Xu, Z. Chen, F. Evrendilek and S. Sun, *Bioresource Technol.*, 2022, **345**, 126346.
- 5 J.L.F. Alves, J.C.G. Da Silva, N. Sellin, F.D.B. Prá, C. Sapelini, O. Souza and C. Marangoni, *Environ. Sci. Pollut. R.*, 2022, **29**, 25733-25747.
- 6 C. Chen, R. Yang, X. Wang, B. Qu, M. Zhang, G. Ji and A. Li, *Chemosphere*, 2022, **289**, 133009.
- 7 I. Abdullah, N. Ahmad, M. Hussain, A. Ahmed, U. Ahmed and Y. Park, *Chemosphere*, 2022, **295**, 133894.
- 8 H. Haykiri-Acma and S. Yaman, *Biomass Conversion and Biorefinery*, 2022.
- 9 B. Grycova, K. Klemencova, L. Jezerska, M. Zidek and P. Lestinsky, *Biomass Conversion and*

- Biorefinery*, 2022.
- 10 J. Ma, Z. Zhang, Z. Wang, W. Kong, S. Feng, B. Shen and L. Mu, *Fuel*, 2022, **313**, 122845.
  - 11 M.A. Sukiran, W.M.A. Wan Daud, F. Abnisa, A.B. Nasrin, A.A. Astimar and S.K. Loh, *Biomass Conversion and Biorefinery*, 2021, **11**, 461-472.
  - 12 B.B. Nyakuma, O. Oladokun, S.L. Wong and T.A.T. Abdullah, *Biomass Conversion and Biorefinery*, 2021.
  - 13 Y. Yu, Z. Zhu, L. Wang, G. Wang and X. Bai, *Bioenerg. Res.*, 2021.
  - 14 K.C. Oh, J. Kim, S.Y. Park, S.J. Kim, L.H. Cho, C.G. Lee, J. Roh and D.H. Kim, *Energy*, 2021, **214**, 119027.
  - 15 Y. Sun, S. Tong, X. Li, F. Wang, Z. Hu, O.D. Dacres, E.M.A. Edreis, N. Worasuwannarak, M. Sun, H. Liu, H. Hu, G. Luo and H. Yao, *Bioresource Technol.*, 2021, **319**, 124216.
  - 16 L. Liao, J. Zheng, Y. Zhang, C. Li and C. Yuan, *Fuel*, 2021, **289**, 119919.
  - 17 Y. Lin, N. Zheng and C. Hsu, *J. Clean. Prod.*, 2021, **284**, 124676.
  - 18 E.A. Silveira, S.M. Luz, R.M. Leão, P. Rousset and A. Caldeira-Pires, *Biomass and Bioenergy*, 2021, **146**, 105981.
  - 19 N. Setkit, X. Li, H. Yao and N. Worasuwannarak, *Bioresource Technol.*, 2021, **321**, 124502.
  - 20 Z. Feng, J. Yang, L. Ni, Q. Gao and Z. Liu, *Environ. Prog. Sustain.*, 2021, **40**.
  - 21 C. Chen, G. Ji, L. Mu, Y. Zhang and A. Li, *Sustainable Energy & Fuels*, 2021, **5**, 687-697.
  - 22 J. Fu, S. Summers, S.Q. Turn and W. Kusch, *Fuel*, 2021, **291**, 120260.
  - 23 P. Kongto, A. Palamanit, S. Chairapat and N. Tippayawong, *Renew. Energ.*, 2021, **170**, 703-713.
  - 24 X. Cao, J. Zhang, K. Cen, F. Chen, D. Chen and Y. Li, *Biomass and Bioenergy*, 2021, **148**, 106061.
  - 25 Y. Lin and N. Zheng, *Energy*, 2021, **225**, 120226.
  - 26 M.A. Sukiran, W.M.A. Wan Daud, F. Abnisa, A.B. Nasrin, A. Abdul Aziz and S.K. Loh, *Energy*, 2021, **230**, 120877.
  - 27 K. Patidar and M. Vashishtha, *Materials Today: Proceedings*, 2021, **44**, 4072-4078.
  - 28 B. Lee, L. Sh, D. Lee and C. Jeon, *Biomass and Bioenergy*, 2021, **151**, 106133.
  - 29 J.A.D.M. Carneiro-Junior, G.F.D. de Oliveira, C.T. Alves, H.M.C. Andrade, S.A.B.V. Beisl Vieira De Melo and E.A. Torres, *Energies*, 2021, **14**, 3465.
  - 30 D.T. Pedroso, E.B. Machin, G. Cabrera-Barjas, M. Flores, H.G. Urra, F.S. de Carvalho, M.I.S.D. Santos, A.B. Machín, E.V. Canettieri, N.P. Pérez, P. Teixeira Lacava, L. Ribeiro Dos Santos and J. Andrade De Carvalho Júnior, *Applied Sciences*, 2021, **11**, 6105.
  - 31 H. Ullah, L. Lun, L. Riaz, F. Naseem, A. Shahab and A. Rashid, *Biomass Conversion and Biorefinery*, 2021.
  - 32 C. Chen, B. Qu, W. Wang, W. Wang, G. Ji and A. Li, *Environmental Technology & Innovation*, 2021, **24**, 101872.
  - 33 R. Li, C. Wu, L. Zhu, Z. Hu, J. Xu, Y. Yang, F. Yang and Z. Ma, *Fuel Process. Technol.*, 2021, **222**, 106983.
  - 34 A. Lampropoulos, N. Kaklidis, C. Athanasiou, M.A. Montes-Morán, A. Arenillas, J.A. Menéndez, V.D. Binas, M. Konsolakis and G.E. Marnellos, *Int. J. Hydrogen Energ.*, 2021, **46**, 29126-29141.
  - 35 W. Tsai, T. Jiang, M. Tang, C. Chang and T. Kuo, *Biomass Conversion and Biorefinery*, 2021.
  - 36 M. Ivanovski, A. Petrovic, I. Ban, D. Goricanec and D. Urbancl, *Materials*, 2021, **14**, 7877.
  - 37 N.D. Duranay and G. Akkuş, *Biomass Conversion and Biorefinery*, 2021, **11**, 2335-2346.
  - 38 H. Demey, E. Rodriguez-Alonso, E. Lacombe, M. Grateau, N. Jaricot, A. Chatroux, S. Thiery, M. Marchand and T. Melkior, *Metals*, 2021, **11**, 1905.

- 39 J. Khempila, P. Kongto and P. Meena, *Bioenerg. Res.*, 2021.
- 40 L.D.Y.W. Xiaojie Tiana, *Bioresource Technol.*, 2020.
- 41 J. Hu, Y. Song, J. Liu, F. Evrendilek, M. Buyukada, Y. Yan and L. Li, *Bioresource Technol.*, 2020, **304**, 122960.
- 42 J. Huang, Y. Qiao, Z. Wang, H. Liu, B. Wang and Y. Yu, *Energ. Fuel.*, 2020, **34**, 6041-6051.
- 43 S. Singh, J.P. Chakraborty and M.K. Mondal, *Renew. Energ.*, 2020, **153**, 711-724.
- 44 K. Manatura, *Case Studies in Thermal Engineering*, 2020, **19**, 100623.
- 45 X. Liu, Z. Yao, L. Zhao, J. Song and J. Jia, *Energ. Fuel.*, 2020, **34**, 5997-6007.
- 46 R.K. Singh, K. Jena, J.P. Chakraborty and A. Sarkar, *Int. J. Hydrogen Energ.*, 2020, **45**, 18922-18936.
- 47 X. Liu, Z. Yao, H. Cong, L. Zhao, L. Huo and J. Song, *International journal of agricultural and biological engineering*, 2020, **13**, 219-225.
- 48 R. Kizuka, K. Ishii, S. Ochiai, M. Sato, A. Yamada and K. Nishimiya, *Waste and Biomass Valorization*, 2020.
- 49 K. Cen, J. Zhang, D. Chen, F. Chen, Y. Zhang and H. Ma, *Energy sources. Part A, Recovery, utilization, and environmental effects*, 2020, 1-10.
- 50 D. Chen, F. Chen, K. Cen, X. Cao, J. Zhang and J. Zhou, *Fuel*, 2020, **275**, 117936.
- 51 M. Simonic, D. Goricanec and D. Urbancl, *Sci. Total Environ.*, 2020, **740**, 140086.
- 52 H. Mukhtar, N. Feroze, H.M.S. Munir, F. Javed and M. Kazmi, *Energy sources. Part A, Recovery, utilization, and environmental effects*, 2020, **42**, 2526-2544.
- 53 J.C.G. Da Silva, J.L.C. Pereira, S.L.F. Andersen, R.D.F.P. Moreira and H.J. José, *Energy*, 2020, **210**, 118569.
- 54 J. Mokrzycki, M. Gazińska, M. Fedyna, R. Karcz, E. Lorenc-Grabowska and P. Rutkowski, *Biomass and Bioenergy*, 2020, **143**, 105842.
- 55 L. Wang, L. Riva, Ø. Skreiberg, R. Khalil, P. Bartocci, Q. Yang, H. Yang, X. Wang, D. Chen, M. Rudolfsson and H.K. Nielsen, *Energ. Fuel.*, 2020, **34**, 15343-15354.
- 56 S. Kanwal, N. Chaudhry, S. Munir and H. Sana, *Waste Manage.*, 2019, **88**, 280-290.
- 57 R.K. Singh, A. Sarkar and J.P. Chakraborty, *Renew. Energ.*, 2019, **138**, 805-819.
- 58 D. Chen, A. Gao, Z. Ma, D. Fei, Y. Chang and C. Shen, *Bioresource Technol.*, 2018, **253**, 148-153.
- 59 M.W.R.S. Aneta Magdziarz, *J. Therm. Anal. Calorim.*, 2017, 1339-1349.
- 60 P. McNamee, P.W.R. Adams, M.C. McManus, B. Dooley, L.I. Darvell, A. Williams and J.M. Jones, *Energ. Convers. Manage.*, 2016, **113**, 177-188.
- 61 A. Toptas, Y. Yildirim, G. Duman and J. Yanik, *Bioresource Technol.*, 2015, **177**, 328-336.
- 62 H. Nam and S. Capareda, *Energy*, 2015, **91**, 507-516.
- 63 Y. Chen, H. Yang, Q. Yang, H. Hao, B. Zhu and H. Chen, *Bioresource Technol.*, 2014, **156**, 70-77.
- 64 K. Lu, W. Lee, W. Chen, S. Liu and T. Lin, *Bioresource Technol.*, 2012, **123**, 98-105.
- 65 T.G. Bridgeman, J.M. Jones, I. Shield and P.T. Williams, *Fuel*, 2008, **87**, 844-856.
- 66 L. Xiaorui, Y. Longji and Y. Xudong, *Evolution of chemical functional groups during torrefaction of rice straw*, 2021.

**Table S2.** Dataset description.

| Feature                 | Name | Unit  | Count | Range       | Mean   | Median | Std   |
|-------------------------|------|-------|-------|-------------|--------|--------|-------|
| Volatile content        | VM   | wt.%  | 515   | 32.2~96.4   | 77.02  | 78.9   | 8.28  |
| Ash content             | ASH  | wt.%  | 515   | 0~32.58     | 5.48   | 3.3    | 5.76  |
| Fixed carbon content    | FC   | wt.%  | 510   | 1.67~61.4   | 14.72  | 15.47  | 5.91  |
| Carbon content          | C    | wt.%  | 497   | 29.59~54.16 | 44.83  | 45.1   | 4.73  |
| Hydrogen content        | H    | wt.%  | 497   | 3.92~8.78   | 5.99   | 6.03   | 0.69  |
| Oxygen content          | O    | wt.%  | 488   | 11.37~61.55 | 43.83  | 44.46  | 7.57  |
| Nitrogen content input  | Ni   | wt.%  | 488   | 0~14.29     | 1.24   | 0.59   | 2.09  |
| Temperature             | Temp | °C    | 515   | 200~300     | 255.27 | 250    | 32.63 |
| Duration time           | time | min   | 491   | 10~360      | 46.78  | 30     | 35.20 |
| Nitrogen content output | No   | wt.%  | 379   | 0~8.32      | 0.94   | 0.65   | 1.066 |
| High heating value      | HHV  | MJ/kg | 491   | 13.48~30.3  | 21.45  | 20.67  | 9.76  |

**Table S3.** Pearson correlation coefficient between any two features

|      | VM       | ASH      | FC       | C        | H        | O        | Ni       | Temp     | time     | No       | HHV      |
|------|----------|----------|----------|----------|----------|----------|----------|----------|----------|----------|----------|
| VM   | 1        | -0.7317  | -0.43149 | 0.285685 | 0.352266 | 0.285826 | -0.33873 | -0.02405 | -0.06716 | -0.35123 | 0.298119 |
| ASH  | -0.7317  | 1        | -0.12584 | -0.42392 | -0.41282 | -0.46098 | 0.459565 | -0.03273 | 0.090307 | 0.487347 | -0.45297 |
| FC   | -0.43149 | -0.12584 | 1        | 0.079571 | -0.10953 | 0.258776 | -0.10976 | 0.084657 | -0.11562 | -0.12312 | 0.08098  |
| C    | 0.285685 | -0.42392 | 0.079571 | 1        | 0.408945 | -0.3595  | -0.11518 | 0.052636 | 0.089709 | -0.07764 | 0.352604 |
| H    | 0.352266 | -0.41282 | -0.10953 | 0.408945 | 1        | -0.09801 | -0.20271 | -0.01187 | -0.16022 | -0.17366 | 0.190531 |
| O    | 0.285826 | -0.46098 | 0.258776 | -0.3595  | -0.09801 | 1        | -0.493   | -0.02632 | -0.24606 | -0.50098 | 0.07209  |
| Ni   | -0.33873 | 0.459565 | -0.10976 | -0.11518 | -0.20271 | -0.493   | 1        | 0.019569 | 0.083976 | 0.926905 | -0.07889 |
| Temp | -0.02405 | -0.03273 | 0.084657 | 0.052636 | -0.01187 | -0.02632 | 0.019569 | 1        | -0.03492 | 0.036689 | 0.455955 |
| time | -0.06716 | 0.090307 | -0.11562 | 0.089709 | -0.16022 | -0.24606 | 0.083976 | -0.03492 | 1        | 0.153204 | 0.312025 |
| No   | -0.35123 | 0.487347 | -0.12312 | -0.07764 | -0.17366 | -0.50098 | 0.926905 | 0.036689 | 0.153204 | 1        | -0.01633 |
| HHV  | 0.298119 | -0.45297 | 0.08098  | 0.352604 | 0.190531 | 0.07209  | -0.07889 | 0.455955 | 0.312025 | -0.01633 | 1        |
